# Supplementary figures and images for: Initial sequencing and analysis of the human genome
Source: Springer Nature journal article supplement (doi:10.1038/35057062), 2001-02-01

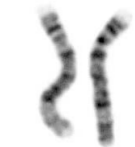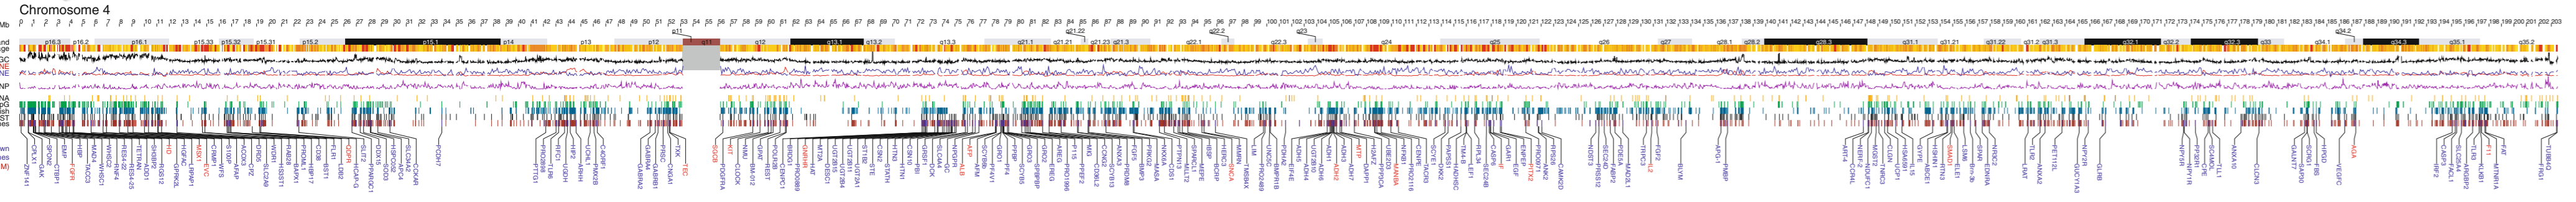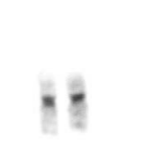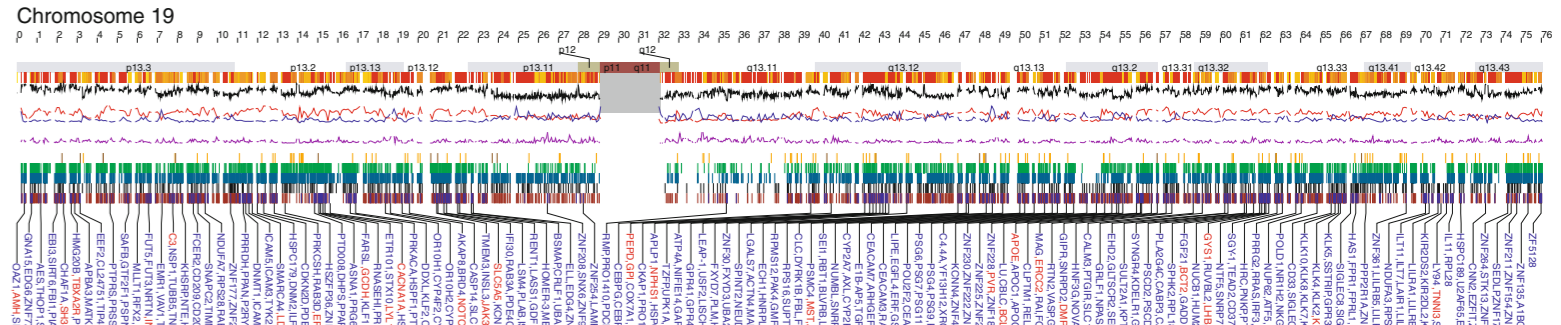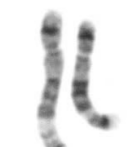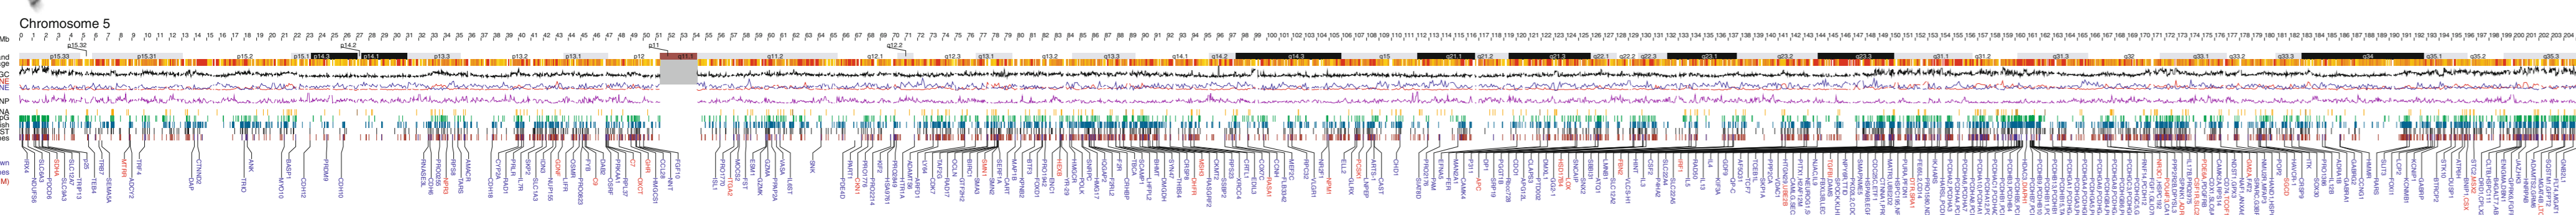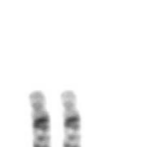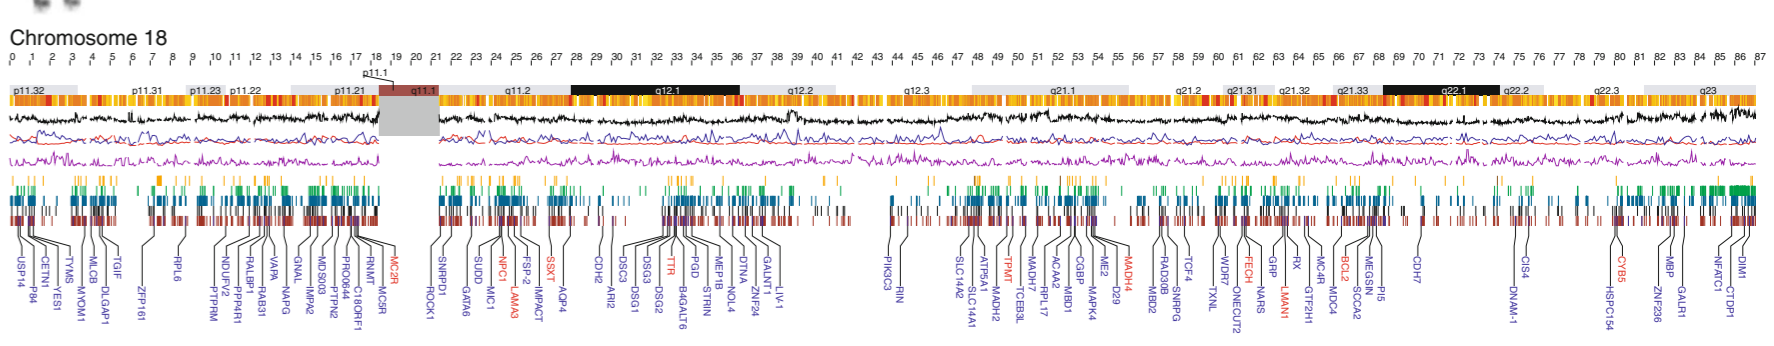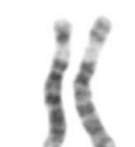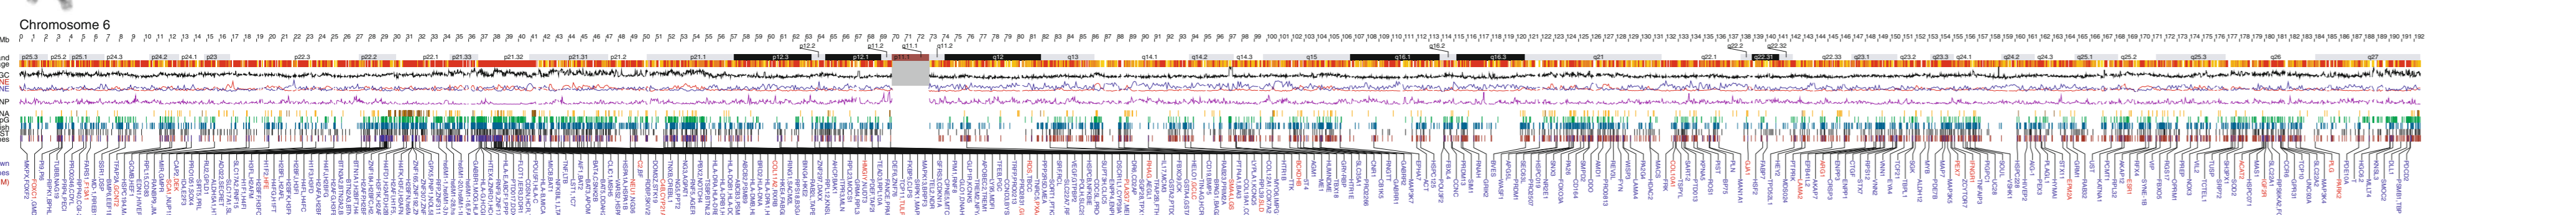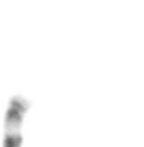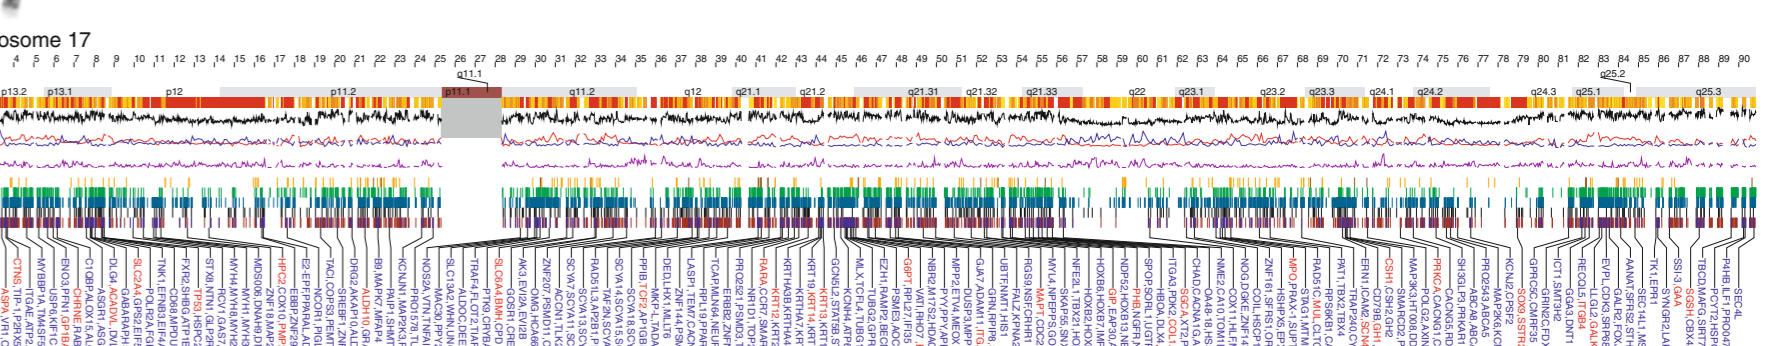

Supplement: 41586_2001_BF35057062_MOESM3_ESM.pdf [file 41586_2001_BF35057062_MOESM3_ESM.pdf]

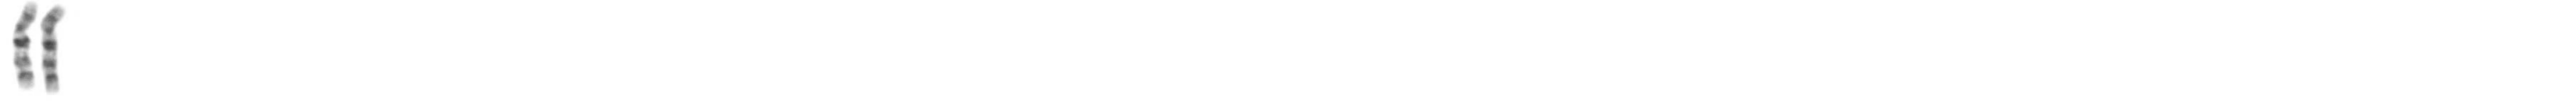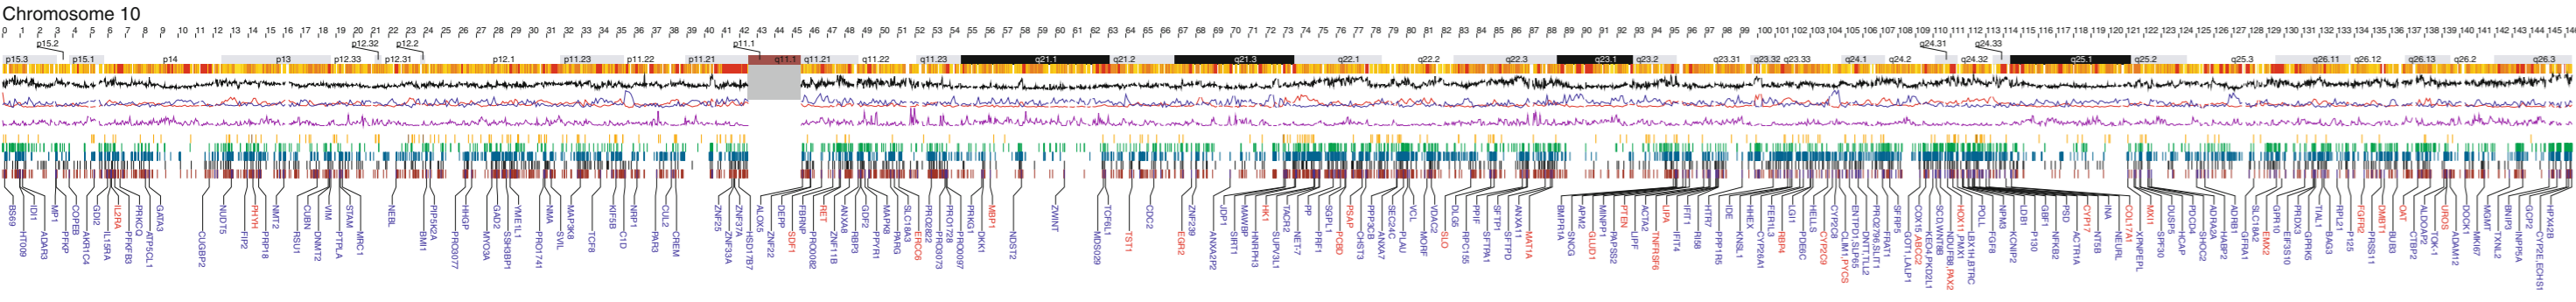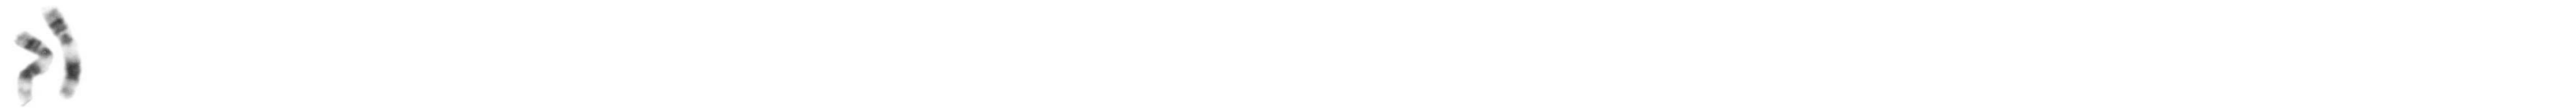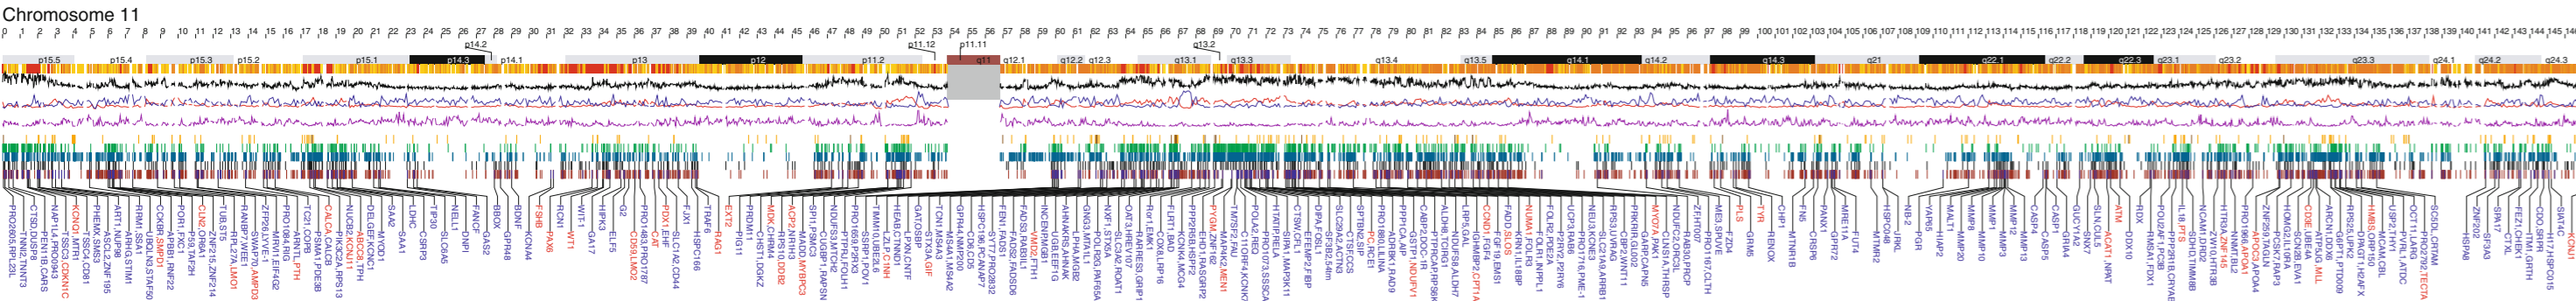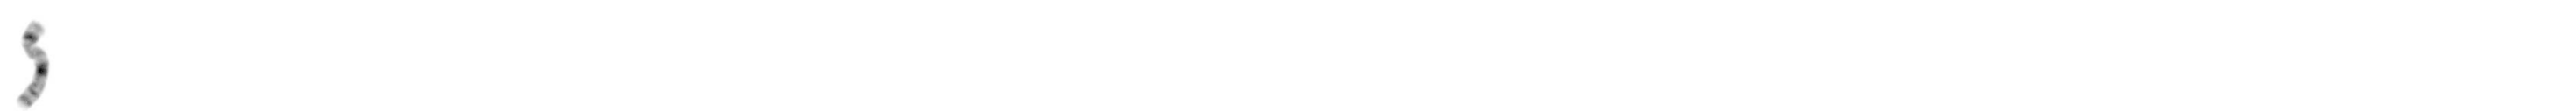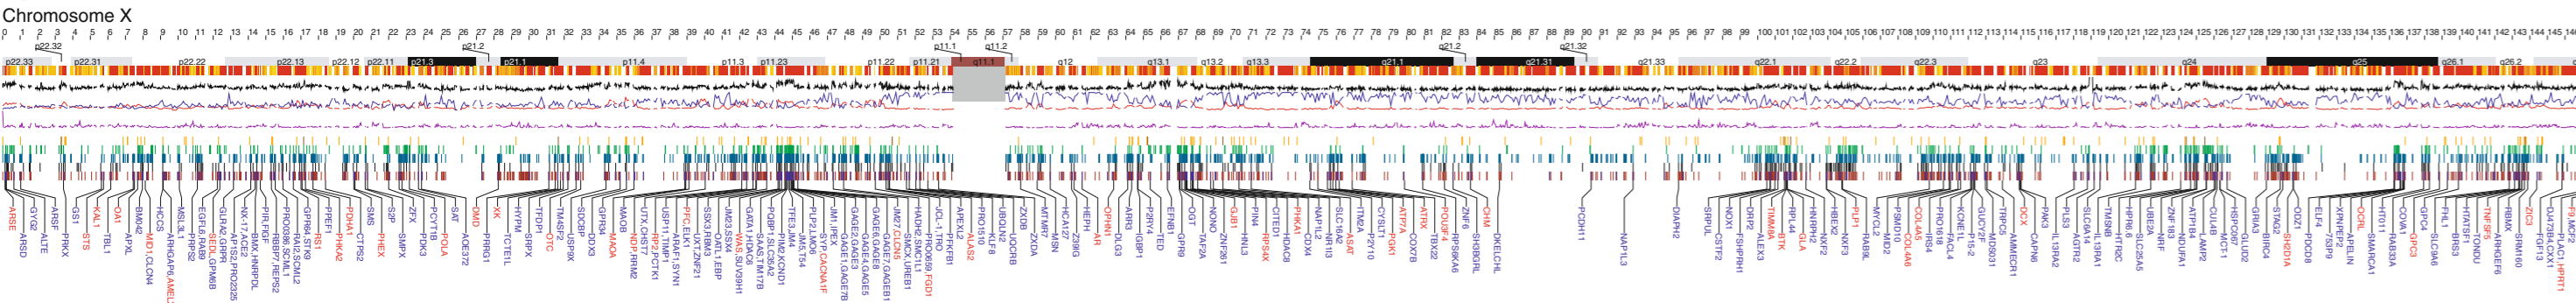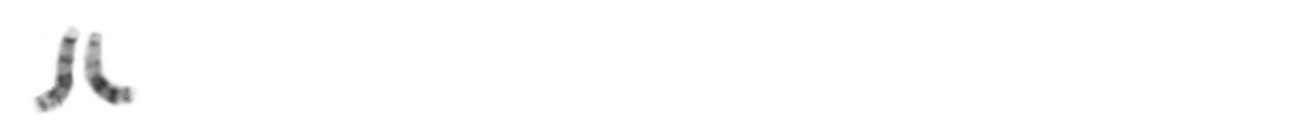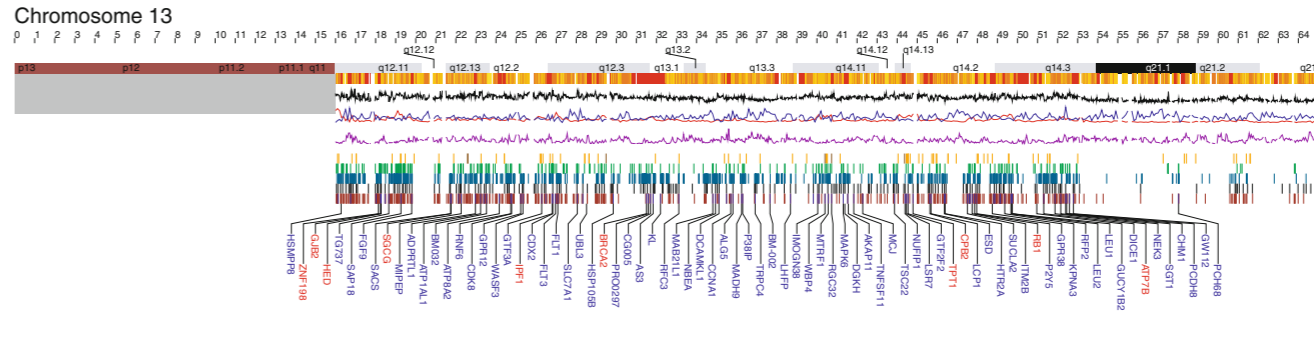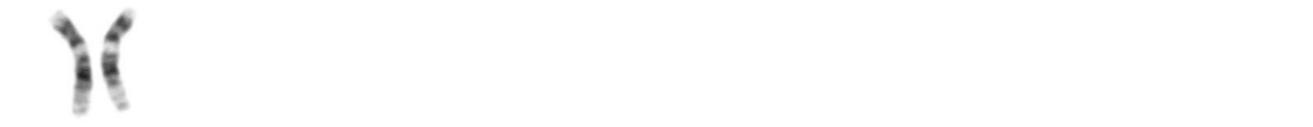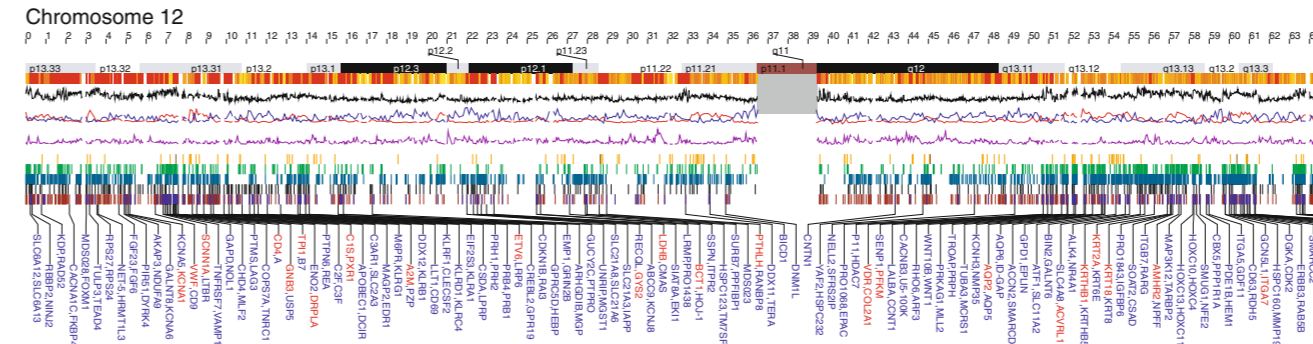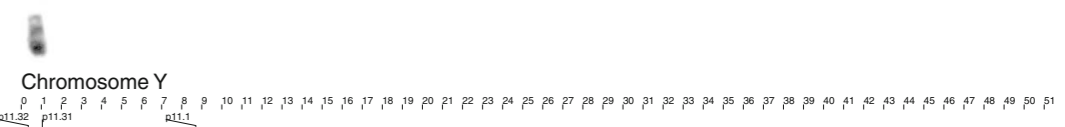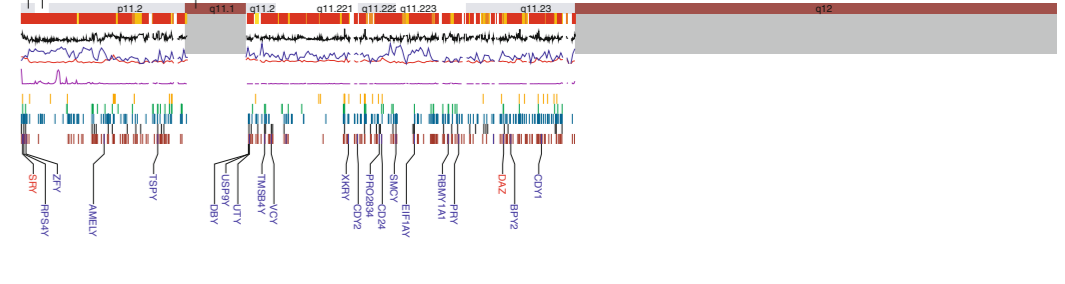

Supplement: 41586_2001_BF35057062_MOESM5_ESM.pdf [file 41586_2001_BF35057062_MOESM5_ESM.pdf]
